# Supplementary material for: How optometrists are embracing Telehealth in Australia- identifying uses, attitudes, acceptance barriers and facilitators
Source: Research Square preprint supplement (doi:10.21203/rs.3.rs-7359730/v1), 2025-08-22
Supplement: Supplementary file 1 [file 87d797fa3fd6f875f5de599d.docx]

**Supplementary Table 1: Self-administered online survey**

**Definition of Telehealth**

In this survey, Telehealth is defined as the use of technology to communicate and provide care to patients without being in the same room. It is often used in conjunction with face-to-face consultations and encompasses preventative, detection, diagnosis, and management aspects of eyecare. Telehealth services include video conferencing, phone calls, email interactions and other modes of communication between patient and health practitioner, or between health practitioners. It can be synchronous (real time) or asynchronous (store-and-forward). This survey investigates the current use of Telehealth and scope of practice in Australia. Please respond to all statements to the best of your ability. Your participation is highly appreciated!

| **Section 1. Participant characteristics**  Please choose one option that is most relevant to you. | 1. **Which gender do you identify with?**  - Male - Female - Non-binary - I use a different term: Please specify: [ __ ] - Prefer not to say  1. **What is your age?**  - <25 - 25-29 - 30-39 - 40-49 - 50-59 - 60-69 - 70-79 - 80+  1. **How many years (total full-time equivalent) have you been** **practicing in primary eye care?**  - <5 years - 5-9 - 10-14 - 15-19 - 20-24 - 25-29 - 30-34 - 35-39 - 40+  1. **What is the highest qualification you have completed?**  - Bachelor’s degree - Master’s degree - Doctoral degree - Other: Please specify: [ __ ]  1. **In which state or territory is your main workplace located?**  - Australian Capital Territory - New South Wales - Northern Territory - Queensland - South Australia - Tasmania - Victoria - Western Australia  1. **Where is your main workplace located?**  - Major city or surrounding suburbs - Regional centre or surrounding districts - Small rural town/country area - Remote or very remote area  1. **What is your main work setting?**  - Public hospital/clinic - Private hospital/clinic - Community health centre - Educational institution - Corporate practice - Independent practice  1. **How is your main workplace funded? (Select all that apply)**  - Medicare bulk billing - Medicare non-bulk billing - Private health insurance - Private spectacles sales - Private contact lens sales - Not-for-profit organisation/s - State government - Other: Please specify: [ __ ]  1. **How many patients do you see at your main workplace on an average day?**  - <5 - 5-9 - 10-14 - 15-19 - 20+  1. **How easy or difficult is it for you to obtain the ophthalmology services you need for your patient at your main workplace?**  - Very easy - Easy - Moderate - Difficult - Very difficult   **The following questions relate to your workplace technology.**   1. **In your MAIN workplace, what ophthalmic devices are used when providing care to patients? (Select all that apply)**  - Fundus camera - Optical coherence tomography (OCT) - OCT-angiography - Fundus autofluorescence - Ultra-wide field imaging (Optomap) - Corneal topographer - Slitlamp camera - Dry eye devices e.g. IPL, Lipiflow, meibographer - Other; please specify: _____ - None of the above  1. **In your OTHER (if any) workplaces, what ophthalmic devices have you previously used to provide care to patients? (Select all that apply)**  - Fundus camera - Optical coherence tomography (OCT) - OCT-angiography - Fundus autofluorescence - Ultra-wide field imaging (Optomap) - Corneal topographer - Slitlamp camera - Dry eye devices e.g. IPL, Lipiflow, meibographer - Other; please specify: _____ - None of the above  1. **What computerized systems are used at your main workplace? (Select all that apply)**  - Electronic medical record - Electronic patient appointment system - Online patient booking system (patient can book an appointment directly) - Billing tracking software (e.g. for Medicare claims, dispensing sales) - Electronic therapeutics prescribing - Dedicated electronic referral/report management software (e.g. Sunix, Optomate) - Telehealth software/platform; please specify: - Other; please specify: - None of the above  1. **Who oversees the IT systems at your main workplace? (select all that apply)**  - External, contracted IT service provider - Practice manager - Administrative staff member - Colleague - Myself - Other; please specify _______ - Don’t know |
| --- | --- |
| **Section 2. Current Use of Telehealth**  Please choose the best fit option according to your individual practice. | 1. **Do you utilise Telehealth in your practice?**    1. Yes    2. No (skip to Section 3) 2. **On average, how frequently do you utilise Telehealth in your practice?**  - All the time – multiple times per day - Frequently – multiple times per week - Sometimes – few times per month - Rarely  1. **Have you received Telehealth-related training?**  - Yes - No (skip to Q5)  1. **What is the average duration of your Telehealth training?**  - 30-60mins - 2 hr - 1 day - 1 week - Other: Please specify: [ __ ]  1. **What device(s) do you use to provide Telehealth (select all that apply)?**  - Desktop computer - Laptop computer - Ipad/tablet - Smartphone - Other; please specify  1. **Which Telehealth mode(s) do you utilise? (Select all that apply and specify the program(s)/platform(s) used)**  - Real-time (voice calls); please specify - Real-time (video calls); please specify - Follow-up (patient information collected at the store/clinic, follow-up via Telehealth); please specify - Remote patient monitoring (patient collecting data in their homes while having consultation via Telehealth); please specify - Store-and-forward (transmission of clinical data of a patient between healthcare provider, no real time communication) - Other; please specify  1. **Which of the following clinical procedure(s) is typically delivered using Telehealth in your practice (Select all that apply)?**  - Triaging - History taking - Screening tests (e.g Visual acuity, motility, pupils etc) - Refraction/ spectacle prescription assessment - Anterior eye assessment - Posterior eye assessment - Diagnosis - Management - Contact lenses assessment - Other; please specify |
| **Section 3. General attitudes towards Telehealth**  Please indicate the extent to which you agree or disagree with the following statements as they apply to primary eye care.  Please respond based on your views alone.  Options: (Strongly agree, Disagree, Neither agree nor disagree, Agree, Strongly agree) | **Q22:** *Assume that in the following cases, Telehealth is* ***used in conjunction with conventional face-to-face eyecare delivery****.*  Please respond based on your views alone.  **Attitudes**   - I believe Telehealth is useful in daily practice. - I believe Telehealth should be utilised more in clinical practice. - I believe clinical data obtained through Telehealth is reliable and accurate. - I would be more inclined to use Telehealth if I receive further training. - My attitude towards using Telehealth in my practice has improved after the COVID-19 pandemic. - I believe I can effectively build good patient rapport using Telehealth. - I believe there are minimal security risks associated with the adoption of clinical Telehealth. |
| **Section 4. Acceptance towards Telehealth**  Please indicate the extent to which you agree or disagree with the following statements as they apply to primary eye care.  Please respond based on your views alone.  Options: (Strongly agree, Disagree, Neither agree nor disagree, Agree, Strongly agree) | **Q22:** *Assume that in the following cases, Telehealth is* ***used in conjunction with conventional face-to-face eyecare delivery****.*  Please respond based on your views alone.  **Q23**  **Performance expectancy**   - I believe I can provide the same high-quality patient care using Telehealth. - I believe Telehealth would lead to equal or better patient outcomes compared to an in-person clinical setting. - I believe I can provide safe and efficient patient care with Telehealth.   **Hedonic motivation**   - I use Telehealth as a tool to aid the diagnosis of eye conditions and diseases. - I use Telehealth as a tool to aid the management of eye conditions and diseases. - I believe there is a need for Telehealth in primary care.   **Effort expectancy**   - I use Telehealth to save time. - I find Telehealth easy to use. - Using Telehealth is enjoyable.   **Q24**  **Social influence**   - People who influence my work behaviour think I should use Telehealth. - People whose opinions I value prefer I use Telehealth.   **Facilitating conditions**   - Telehealth fits into my clinical workflow. - Telehealth is compatible with other technologies I use. - I can get help from others when I have difficulty using Telehealth. - I have the knowledge necessary to use Telehealth. - I have the knowledge necessary to solve Telehealth software and hardware issues. |
| **Section 5. Perceived Barriers and Facilitators for Telehealth**  Please indicate the extent to which you agree or disagree with the following statements as they apply to primary eye care. Please respond based on your views alone.  Options: (Strongly agree, Disagree, Neither agree nor disagree, Agree, Strongly agree) | **Q25: Barriers**:  I believe the following factors are barriers in adopting Telehealth use in my practice:   - Technological limitations (e.g. network connection issue, difficulty in synching applications, interoperability of systems (how they communicate with each other)) - Financial concerns (reimbursement, cost of equipment, lack of financial help) - Limited Telehealth training/ knowledge/skills - Time constraints - Patient's attitudes towards Telehealth - Privacy and security risks - Data accuracy and misdiagnosis - No appropriate regulatory guidelines (‘gold standard of care’) - Lack of autonomy in making decisions about including telehealth in practice - Lack of support from colleagues including leadership   **Q26.** Use the following box to state any other factors that are barriers in adopting Telehealth in your practice: ________  **Q27.**  **Facilitating factors:**  I believe the following factors will encourage me in adopting Telehealth use in my practice:  *(Assume that in the following cases, Telehealth is used in conjunction with conventional face-to-face eyecare delivery.)*   - New Medicare code for Telehealth optometrist-patient consultations - Organisations and corporations promoting Telehealth - Campaigns aimed at the public that raise awareness and promote Telehealth - Telehealth training in tertiary education - Continuing professional development courses in Telehealth - Funding for Telehealth equipment and software - Availability of IT support   Use the following box to state any other factors that will facilitate the use of Telehealth in your practice: __  Use the following box for any other comments: ______ |

### **End of Survey:** Thank you for taking the time to complete this survey. We deeply appreciate your participation in this research survey.

**Supplementary Table 2: Telehealth users- Participant characteristics**

| ***Characteristic*** | ***Results*** % (n/N) |
| --- | --- |
| **Gender** |  |
| Female | 68 (17/25) |
| Male | 32 (8/25) |
| Non-binary | 0 (0/25) |
| Other | 0 (0/25) |
| Prefer not to say | 0 (0/25) |
| **Age** | |
| <25 | 0 (0/25) |
| 25-29 | 8 (2/25) |
| 30-39 | 40 (10/25) |
| 40-49 | 20 (5/25) |
| 50-59 | 28 (7/25) |
| 60-69 | 4 (1/25) |
| 70-79 | 0 (0/25) |
| 80+ | 0 (0/25) |
| **Years in primary care** | |
| <5 | 8 (2/25) |
| 5-9 | 28 (7/25) |
| 10-14 | 8 (2/25) |
| 15-19 | 4 (1/25) |
| 20-24 | 8 (2/25) |
| 25-29 | 24 (6/25) |
| 30-34 | 12 (3/25) |
| 35-39 | 4 (1/25) |
| 40+ | 4 (1/25) |
| **Education** | |
| Bachelor's degree | 28 (7/25) |
| Master's degree | 52 (13/25) |
| Doctoral degree | 12 (3/25) |
| Other | 8 (2/25) |
| **Workplace state/territory location** |  |
| Australian Capital Territory | 4 (1/25) |
| New South Wales | 28 (7/25) |
| Northern Territory | 0 (0/25) |
| Queensland | 8 (2/25) |
| South Australia | 4 (1/25) |
| Tasmania | 0 (0/25) |
| Victoria | 44 (11/25) |
| Western Australia | 12 (3/25) |
| **Workplace location** |  |
| Major city or surrounding suburbs | 72 (18/25) |
| Regional centre or surrounding districts | 20 (5/25) |
| Small rural town/country area | 4 (1/25) |
| Remote/very remote area | 4 (1/25) |
| **Main workplace setting** |  |
| Public hospital clinic | 0 (0/25) |
| Private hospital/clinic | 4 (1/25) |
| Community health centre | 0 (0/25) |
| Educational institution | 16 (4/25) |
| Corporate practice | 44 (11/25) |
| Independent practice | 36 (9/25) |

| **Workplace funding***** | |
| --- | --- |
| Medicare bulk billing | 84 (21/25) |
| Medicare non-bulk billing | 24 (6/25) |
| Private health insurance | 56 (14/25) |
| Private spectacles sales | 68 (17/25) |
| Private contact lens sales | 60 (15/25) |
| Not-for-profit organisations | 8 (2/25) |
| State government | 0 (0/25) |
| Other | 16 (4/25) |
| Mixed | 80 (20/25) |
| **Number of patients seen per day** | |
| <5 | 4 (1/25) |
| 5-9 | 20 (5/25) |
| 10-14 | 52 (13/25) |
| 15-19 | 20 (5/25) |
| 20+ | 4 (1/25) |
| **Ease of access to ophthalmology services** | |
| Very easy | 44 (11/25) |
| Easy | 36 (9/25) |
| Moderate | 16 (4/25) |
| Difficult | 4 (1/25) |
| Very difficult | 0 (0/25) |
| **Number of ophthalmic devices used** | |
| 1 | 4 (1/25) |
| 2 | 12 (3/25) |
| 3 | 12 (3/25) |
| 4 | 16 (4/25) |
| 5 | 12 (3/25) |
| 6 | 16 (4/25) |
| 7 | 4 (1/25) |
| 8 | 12 (3/25) |
| >8 | 12 (3/25) |
| **Computerised system used*** |  |
| Electronic medical record | 31.94 (23/25) |
| Electronic patient appointment system | 33.33 (24/25) |
| Online patient booking system (patient can book an appointment directly) | 23.61 (17/25) |
| Billing tracking software (e.g. for Medicare claims, dispensing sales) | 25 (18/25) |
| Electronic therapeutics prescribing | 22.22 (16/25) |
| Dedicated electronic referral/report management software (e.g. Sunix, Optomate) | 25 (18/25) |
| Telehealth software/platform | 8.33 (6/25) |
| Other | 1.38 (1/25) |
| None of the above | 0 (0/25) |
| **Dedicated IT system overseer*** |  |
| External, contracted IT service provider | 20.83 (15/25) |
| Practice manager | 5.55 (4/25) |
| Administrative staff member | 8.33 (6/25) |
| Colleague | 5.55 (4/25) |
| Myself | 8.33 (6/25) |
| Other | 6.94 (5/25) |
| Don’t know | 1.38 (1/25) |

n=number of participants selected the option, N=the total number of participants/telehealth users (N=25)

*The questions are formulated as multiple choices; the data is presented as total times of option been selected out of the number of participants.  **Supplementary Table 3: Qualitative free-text comments by Australian optometrists regarding barriers and facilitators to telehealth in optometry**

*Comments from individuals were allocated to separate themes when appropriate. Edits were made for clarity and grammatical errors, and truncated (indicated by […]) without altering original meanings.*

Comments regarding barriers are categorised into the following key themes: 1) Financial concerns, 2) Data accuracy and misdiagnosis, 3) Technological limitations, 4) No appropriate regulatory guidelines, 5) impersonality, 6) lack of demand, and 7). Logistics of data collection.

Comments regarding facilitators are categorised into the following key themes: 1) Financial reimbursement, 2) Need for appropriate regulatory guidelines, 3) Appropriate technological tools

| **COMMENTS REGARDING BARRIERS** | |
| --- | --- |
| **Theme** | **Comments** |
| **Financial concerns** | Getting paid |
| How to get reimbursed for your time in a simple manner. And there is no Medicare code for this. |
| Inability to charge Medicare for the time/teleconference. Private billing can be difficult in these circumstances. |
| Lack of medicare funding is an issue |
| Lack of Medicare rebate. Why should we consult for free?  Patients would expect not to pay for full cost when a similar consultation with their gp is covered. |
| No financial reward (can’t claim it) |
| No Medicare rebate |
| The number one barrier is no Medicare billing for telehealth therefore little incentive  We are a bulk billing practice in a low socio economic area - GP’s have adopted Telehealth so our patients are used to it BUT GP’s can be reimbursed through Medicare. Any Telehealth we do is done free of charge at present |
| **Data accuracy and misdiagnosis** | Much of optometric care requires examination, and I fail to see how that can be achieved well via Telehealth |
| Not being able to examine the patient is a massive limitation and can lead to incorrect diagnosis, totally limiting telehealth’s usefulness |
| The main barrier would be that it would feel like a lot of the times, patients will have to come in anyway for a proper diagnosis and so it feels like we would be double handling a lot of things. When technology improves enough where patients could take retinal photos with their phones, for example, then it would be worthwhile. |
| Unless the person wants to ask advice about the anterior picture they took of their eye with their phone, or wants to describe their migraine auras or floaters and flashes and ask advice- I would ask them for most accurate diagnosis, to come into the clinic: |
| most techniques require patient to be present to use telehealth. in optometry would need a tech still to be gathering data  Not being able to examine the patient is a massive limitation and can lead to incorrect diagnosis, totally limiting telehealth it’s usefulness  I feel the biggest concern wtih telehealth in optometry is that we rely heavily on objective testing and equipment facilitated observations, which cannot be performed in telehealth. It seems useful for follow up, and potentially for better triaging. I would also not consider testing results accurate if collected by a third party at location (eg. Doctor). |
| **Technological** **limitations** | The demographic we service varies and we have a lot of elderly patients, some of whom do not even own smartphones. Plus, if a patient is in assisted care, sometimes they do not have access to the technology necessary to conduct telehealth communications. |
| System for remote (e.g. prescribing) for when necessary  The barrier of a lack of provision to optoms with resources for optimising telehealth consults to obtain reasonable quality data (perfection and high-fidelity data is not reasonable and not the main aim of telehealth (It just needs to be good enough to make a fair assessment and management) under the conditions. It will always be less than the testing in a dedicated consulting room but with the benefit of accessibility.  Lack of free or inexpensive TH software that will connect readily to existing technology and standard software tools, and will embed easily applied vision tools eg amsler grid, questionnaires, Home-based perimetry, projected letter charts, patient side high-res photo or videography, privacy security, and even just pre-attendance /preassessment intake pretesting and pre-screening, questionnaire completion. |
| **No appropriate regulatory guidelines** | Narrow definitions of teleheatth by medicare. (but that should not stops us from using telehelath in any other way, such as telephone or video contacts with patients without ophthals or other specialists, especially when an initial F2F contact has already been made and this is a limited follow up issue or triaging the case for further assessment. 10 telephone call is still telehealth (and used by GPs, even for prescribing) i.e. contacts.  The barrier of a lack of accepted/endorsed/suggested fee structures that are are sensible and financially reasonable (whether in medicare or not) structure to justify our professional time, record keeping , responsibility and administration and associated communications, and how to charge for that.  Also, more definitive guidelines for telehealth practice within Optometry (and training) would be needed before I'd be comfortable almost taking a "medico-legal risk" with telehealth. |
| **Impersonality** | Eyecare is an art, dealing with people behind the screen takes away the art of dealing with a human |
| […] Telehealth [can be used to] avoid sending optometrists to their regional and remote practice sites. It could be considered as a second tier form of care.  We are a hands on profession by training: we don’t build relationships (cultural especially) at arms reach. Optometrists are very accessible to the vast number of people in the community who need diagnosis of vision issues and screening/ management of eye health issues. Encourage people to leave their screens and appear in person for better care. How do they know they only need help for the issue they are asking about? |
| **Lack of demand** | Limited need in my location |
| Upcoming innovations such as AI that can screen and triage eye conditions without human intervention |
| **Logistics of Data Collection** | Good relationship with ophthalmologist required for telehealth to work. |
| most techniques require patient to be present to use telehealth in optometry would need to a tech still to be gathering data |

| **COMMENTS REGARDING FACILITATORS** | |
| --- | --- |
| **Theme** | **Comments** |
| **Financial reimbursement** | […] telehealth […] needs to be funded or how can we afford to do it? We are already time poor. After saying that- many times I have called to check up on a patient or report back after receiving an ophthal letter- at times I felt I should be reimbursed for that 15 minute discussion. |
| Income from it |
| Rebates need to be similar to face to face otherwise why bother when there's increased risk of misdiagnosis?  Having billable time would make it easier to do follow up phone calls instead of review appointments where suitable |
| **Need for appropriate regulatory guidelines** | I think having policies is really important as well as for the removal of some of the restrictions […] |
| Guidelines about in person consultations would need to underpin Telehealth consults. […]  Education of patients that this is NOT a free, cheap or bulletproof service, but it is for THEIR convenience and expedience at the price of the power of a F2F consultation, fee structures for one on one TH consult should be limited to specific ranges <5m, 5-10,....15-20m, 25-30m etc so that it is not a discretionary choice for the clinician to down claim the fee because it is "only telehealth" and we don't want it to look too expensive. |
| **Appropriate technological tools** | Systems that can actually talk to each other (most seem to use data handling processes that are not compatible with each other which is highly frustrating) |
| removal of barriers mentioned earlier, development and access to equipment, ways of providing home-based equipment to lease to patients (eg home IOP, perimetry, mobile phone camera adapters for external eye or even fundus imaging,  […] telehealth and optometry in my opinion are currently not compatible until tech improves at present a person would need to be on the other end with the patient gathering data eg a tech assistant |
